# Supplementary material
Source: publisher figshare collection journal article supplement (https://acs.figshare.com/ndownloader/files/10283109)
Supplement: Supplementary file 1 [file 10283109]

# Supporting Information

## Evaluation of the Interaction Parameter for Poly(solketal methacrylate)-*block*-polystyrene Copolymers

Duk Man Yu<sup>†</sup>, Jose Kenneth D. Mapas<sup>‡</sup>, Hyeyoung Kim<sup>†</sup>, Jaewon Choi<sup>†</sup>, Alexander E. Ribbe<sup>†</sup>,  
Javid Rzayev<sup>\*,‡</sup>, Thomas P. Russell<sup>\*,†,§,||</sup>

<sup>†</sup>Department of Polymer Science and Engineering, University of Massachusetts Amherst, 120  
Governors Drive, Amherst, Massachusetts 01003, United States

<sup>‡</sup>Department of Chemistry, University at Buffalo, The State University of New York, Buffalo,  
New York 14260-3000, United States

<sup>§</sup>Materials Science Division, Lawrence Berkeley National Laboratory, 1 Cyclotron Road,  
Berkeley, California 94720, United States

<sup>||</sup>Beijing Advanced Innovation Center for Soft Matter Science and Engineering, Beijing  
University of Chemical Technology, Beijing 100029, China

### Corresponding Authors

\*E-mail: jrzayev@buffalo.edu, Tel.: (716) 645-4314, Fax: (716) 645-6963

\*E-mail: russell@mail.pse.umass.edu, Tel.: (413) 577 1516, Fax: (413) 577-1510

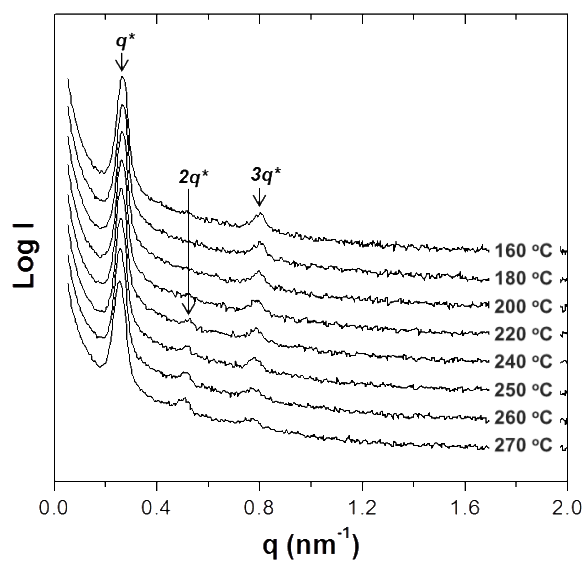

**Figure S1.** SAXS absolute intensity profiles for pristine P(SM21-S22) ( $N = 316$ ) at various temperatures with a heating rate of  $1.0\text{ }^{\circ}\text{C}/\text{min}$ . The temperature-dependent profiles are vertically shifted in the range of  $160\text{ }^{\circ}\text{C}$  to  $270\text{ }^{\circ}\text{C}$ . The primary ( $q^*$ ) and higher order reflections ( $3q^*$ ) of the lamellar structure were observed. The second order peak ( $2q^*$ ) appeared from  $240\text{ }^{\circ}\text{C}$  because of the increase in asymmetric lamellar microdomains by thermal energy. Until  $270\text{ }^{\circ}\text{C}$ , the intensity at  $q^*$  was not changed, indicating that P(SM21-S22) does not show a phase-mixed state and also maintains the condition of  $\chi N > 10.5$ .

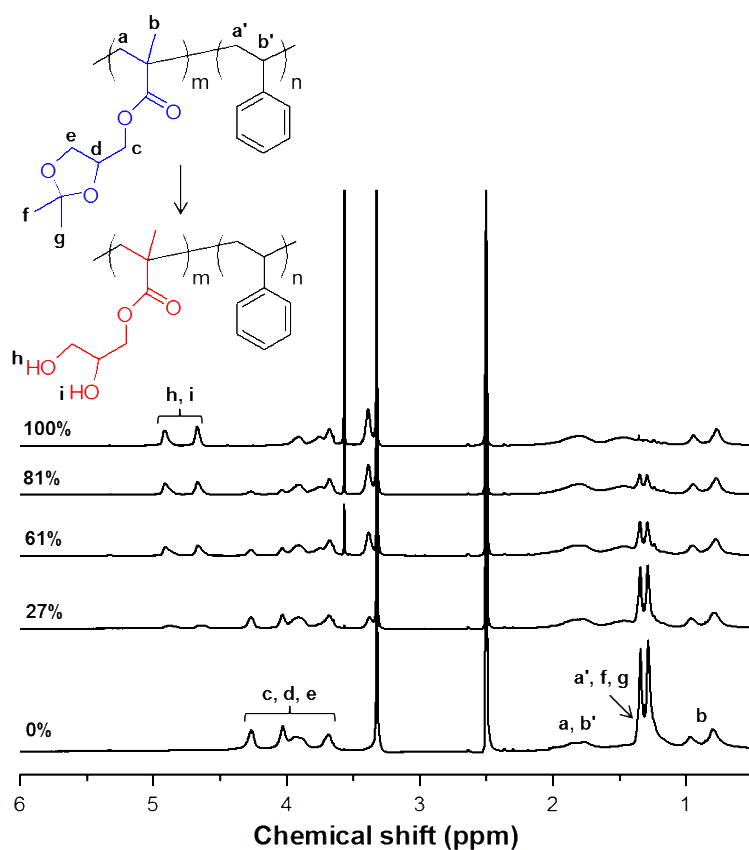

**Figure S2.**  $^1\text{H}$  NMR spectra in  $\text{DMSO-}d_6$  of P(SM13-S14) as a function of the degree of conversion calculated by the ratio of the peak areas between the methyl group of the backbone ( $b$ ; 0.65–1.05 ppm) in SM segments and the hydroxy group ( $h, i$ ; 4.55–4.96 ppm) in GM segments. The spectrums are vertically shifted for clarity.

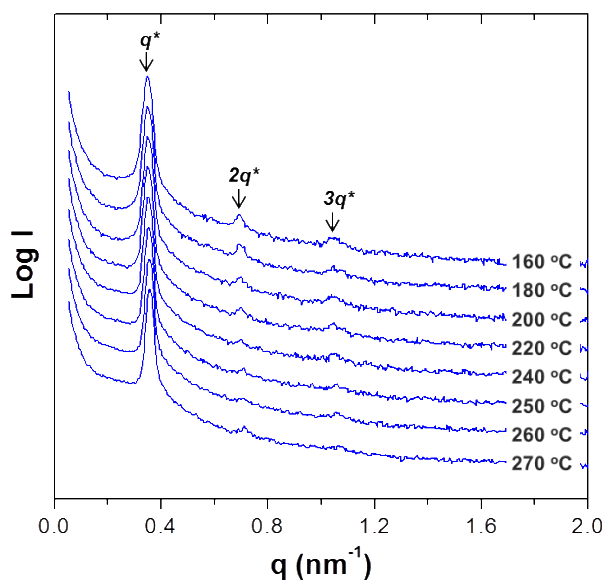

**Figure S3.** SAXS absolute intensity profiles for P(SM13-S14) of 27% conversion ( $N = 197$ ) at various temperatures with a heating rate of 1.0 °C/min. The temperature-dependent profiles are vertically shifted in the range of 160 °C to 270 °C. The  $q^*$  and higher order reflections ( $2q^*$  and  $3q^*$ ) of the lamellar structure were observed. Until 270 °C, the intensity at  $q^*$  was not changed, indicating that P(SM13-S14) does not show a phase-mixed state and also maintains the condition of  $\chi N > 10.5$  at 27% conversion due to the increase in  $\chi$ .

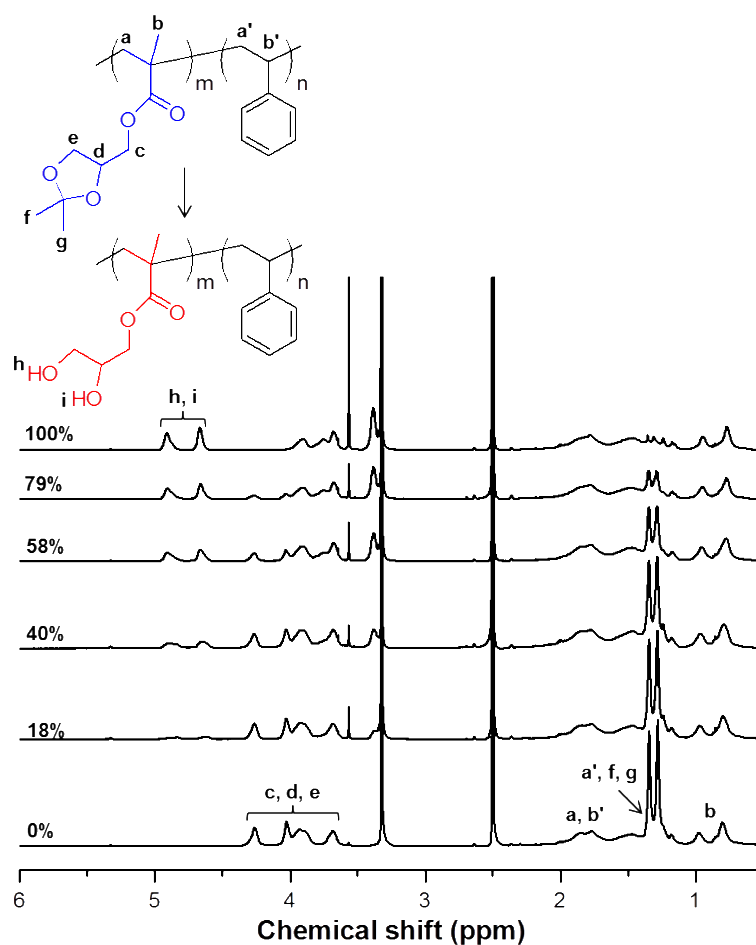

**Figure S4.**  $^1\text{H}$  NMR spectra in  $\text{DMSO-}d_6$  of P(SM5-S5) as a function of the degree of conversion calculated by the ratio of the peak areas between the methyl group of the backbone ( $b$ ; 0.65–1.05 ppm) in SM segments and the hydroxy group ( $h, i$ ; 4.55–4.96 ppm) in GM segments. The spectrums are vertically shifted for clarity.

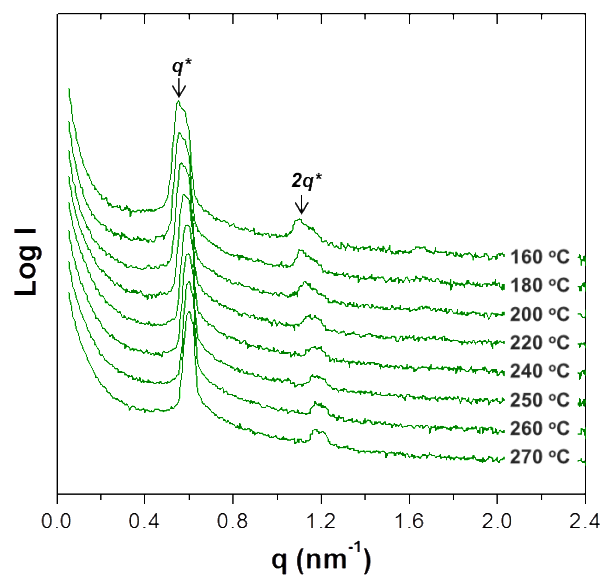

**Figure S5.** SAXS absolute intensity profiles for P(SM5-S5) of 58% conversion ( $N = 76$ ) at various temperatures with a heating rate of 1.0 °C/min. The temperature-dependent profiles are vertically shifted in the range of 160 °C to 270 °C. The  $q^*$  and higher order reflection ( $2q^*$ ) of the lamellar structure were observed. Until 270 °C, the intensity at  $q^*$  was not changed, indicating that P(SM5-S5) does not show a phase-mixed state and also maintains the condition of  $\chi N > 10.5$  at 58% conversion due to the increase in  $\chi$ .

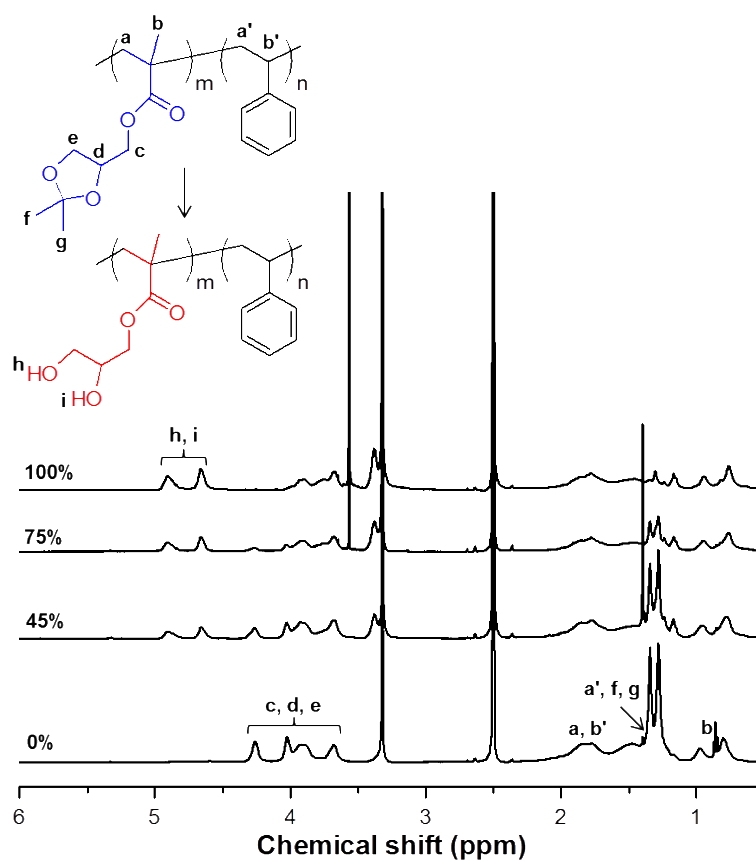

**Figure S6.**  $^1\text{H}$  NMR spectra in  $\text{DMSO}-d_6$  of P(SM2-S2) as a function of the degree of conversion calculated by the ratio of the peak areas between the methyl group of the backbone ( $b$ ; 0.65–1.05 ppm) in SM segments and the hydroxy group ( $h, i$ ; 4.55–4.96 ppm) in GM segments. The spectrums are vertically shifted for clarity.

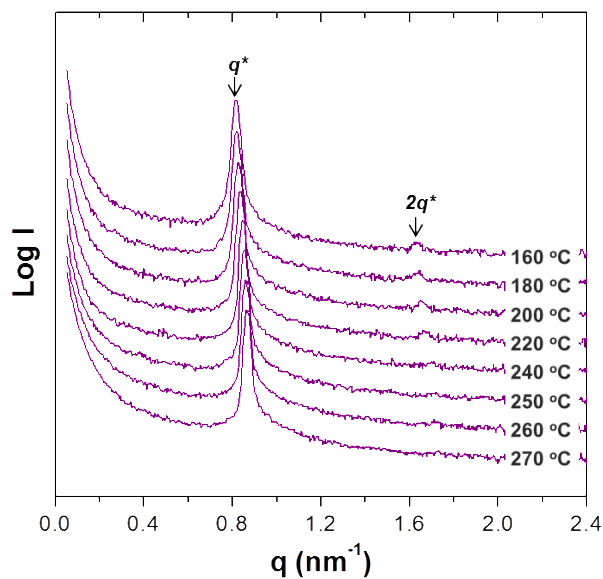

**Figure S7.** SAXS absolute intensity profiles for P(SM2-S2) of 100% conversion ( $N = 30$ ) at various temperatures with a heating rate of 1.0 °C/min. The temperature-dependent profiles are vertically shifted in the range of 160 °C to 270 °C. The  $q^*$  and higher order reflection ( $2q^*$ ) of the lamellar structure were observed. Until 270 °C, the  $q^*$  intensity was not changed, indicating that P(SM2-S2) does not show a phase-mixed state and also maintains the condition of  $\chi N > 10.5$  at 100% conversion due to the increase in  $\chi$ .



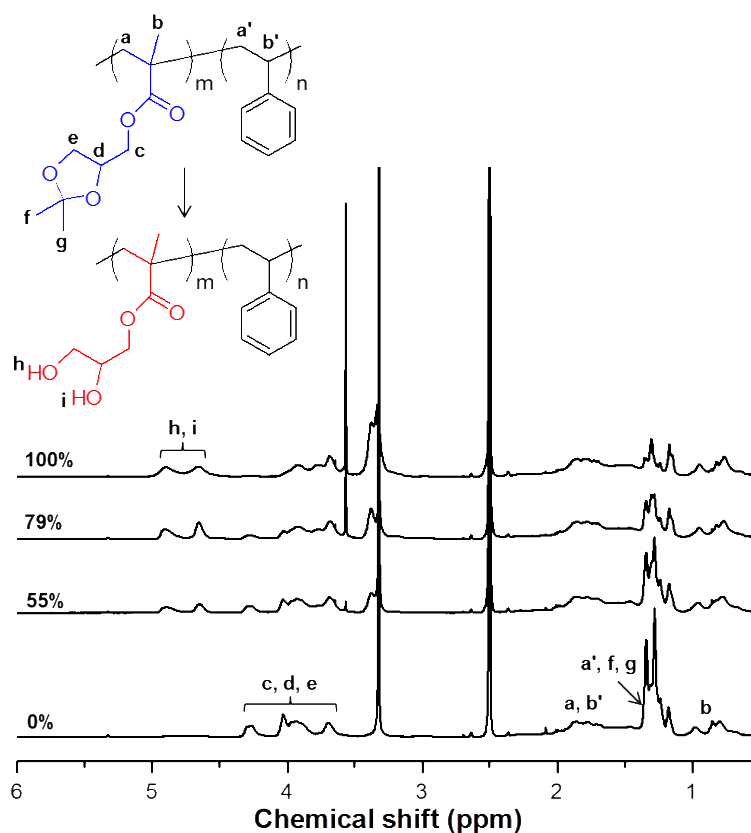

**Figure S8.**  $^1\text{H}$  NMR spectra in  $\text{DMSO-}d_6$  of P(SM1-S1) as a function of the degree of conversion calculated by the ratio of the peak areas between the methyl group of the backbone ( $b$ ; 0.65–1.05 ppm) in SM segments and the hydroxy group ( $h, i$ ; 4.55–4.96 ppm) in GM segments. The spectrums are vertically shifted for clarity.

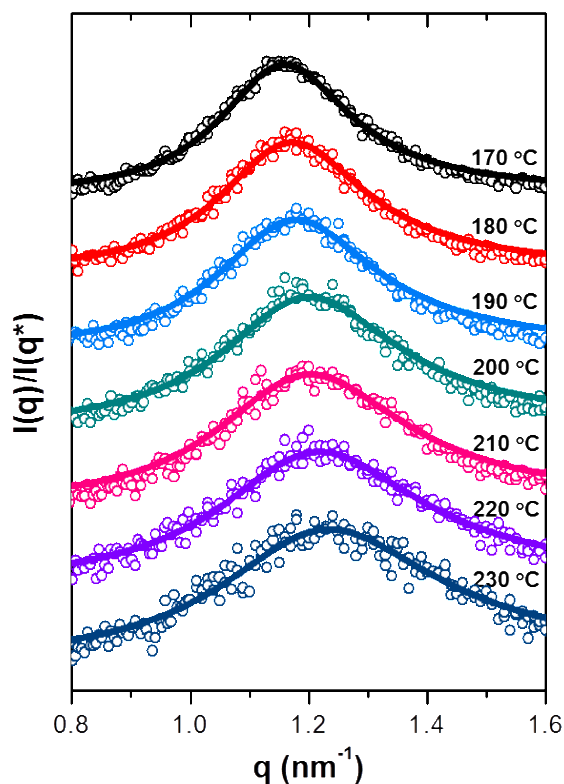

**Figure S9.** The scattering intensity profiles ( $I(q)$ ) divided by the maximum intensity at  $q^*$  ( $I(q^*)$ ) for P(SM1-S1) of 100% conversion ( $N = 16$ ) at various temperatures over  $T_{\text{ODT}}$  (circle). The temperature-dependent profiles from 170 °C to 230 °C are shown, vertically shifted for clarity. By nonlinear regression analysis using  $I(q)/I(q^*) = (F(q^*) - 2\chi)/(F(q) - 2\chi)^{1-3}$  the  $\chi$  value can be obtained at each temperature, where  $F(q)$  is the interference function consisting of the Debye scattering function for individual blocks. The lines in the figure indicate the calculated scattering profiles from the equation fit to the experimental profiles.

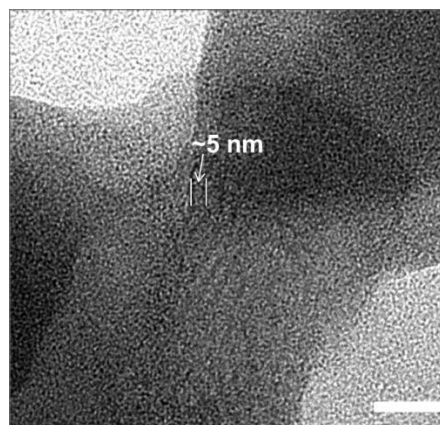

**Figure S10.** TEM image of P(GM1-S1) in bulk. The sample was microtomed into 20 nm thick films using a Leica Ultra Microtome at room temperature after thermal annealing at 140 °C for 24 h. Then, it was stained by exposure to RuO<sub>4</sub> vapor for 20 min. TEM measurements were performed using a JEOL 2200FS TEM at an accelerating voltage of 200 kV. The ~5 nm spacing of the lamellar microdomains were observed as the smallest domain spacing. Since RuO<sub>4</sub> is able to stain polymers having aromatic nucleus as well as hydroxyl groups,<sup>4</sup> the contrast between two lamellar microdomains was not exceptional but sufficient to observe the microdomains. The scale bar is 20 nm.

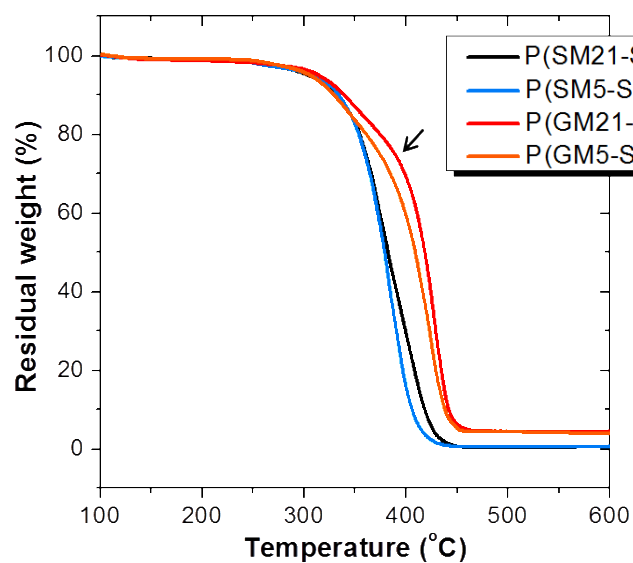

**Figure S11.** TGA curves for PSM-*b*-PS and PGM-*b*-PS copolymers, P(SM21-S22), P(SM5-S5), P(GM21-S22), and P(GM5-S5). The samples were measured at a heating rate of 10 °C/min under nitrogen gas from 100 °C to 700 °C. All copolymers showed that the thermal degradation began at ~270 °C and finished at ~450 °C. In contrast to the PSM-*b*-PS copolymers, the PGM-*b*-PS copolymers showed a two-step thermal degradation, due to the hydroxy groups on the side chain of the PGM block.<sup>5,6</sup> The first step at ~270 °C arose from the decomposition of the polymer backbone (depolymerization) and the second step at ~400 °C (arrow) is attributed to intramolecular side-chain reactions by the dehydration and cyclization of the hydroxy group.

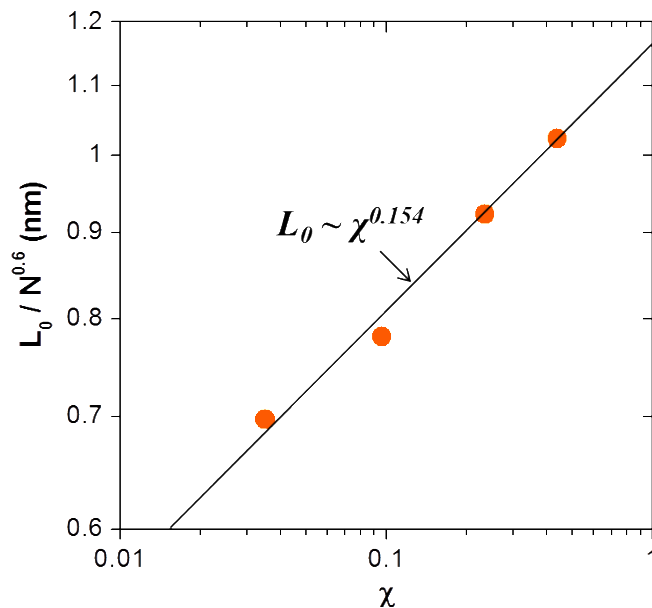

**Figure S12.** Scaling result of the PSM-*b*-PS copolymer between the domain spacing divided by degree of polymerization ( $L_0/N^{0.6}$ ) and the  $\chi$  value. Previously, we reported the relationship between  $L_0$  and  $N$  in the strong segregation regime and it followed  $L_0 \sim N^{0.6}$  for both PSM-*b*-PS and PGM-*b*-PS copolymers.<sup>7</sup> Therefore, we assumed that the randomly hydrolyzed PSM-*b*-PS copolymers also have the same scaling exponent as 0.6. In this manuscript, we evaluated the  $\chi$  values at 0%, 40%, 75%, and 100% conversion. Since each  $\chi$  value was calculated for different molecular weight samples,  $L_0$  was divided by  $N^{0.6}$  to get the relationship between  $L_0$  and  $\chi$  ( $L_0/N^{0.6} \sim \chi^\nu$ ). The scaling exponent ( $\nu$ ) for  $L_0$  and  $\chi$  was found to be 0.154, similar to the theoretical value ( $\nu = \sim 0.167$ ). The graph is plotted on a log–log scale.

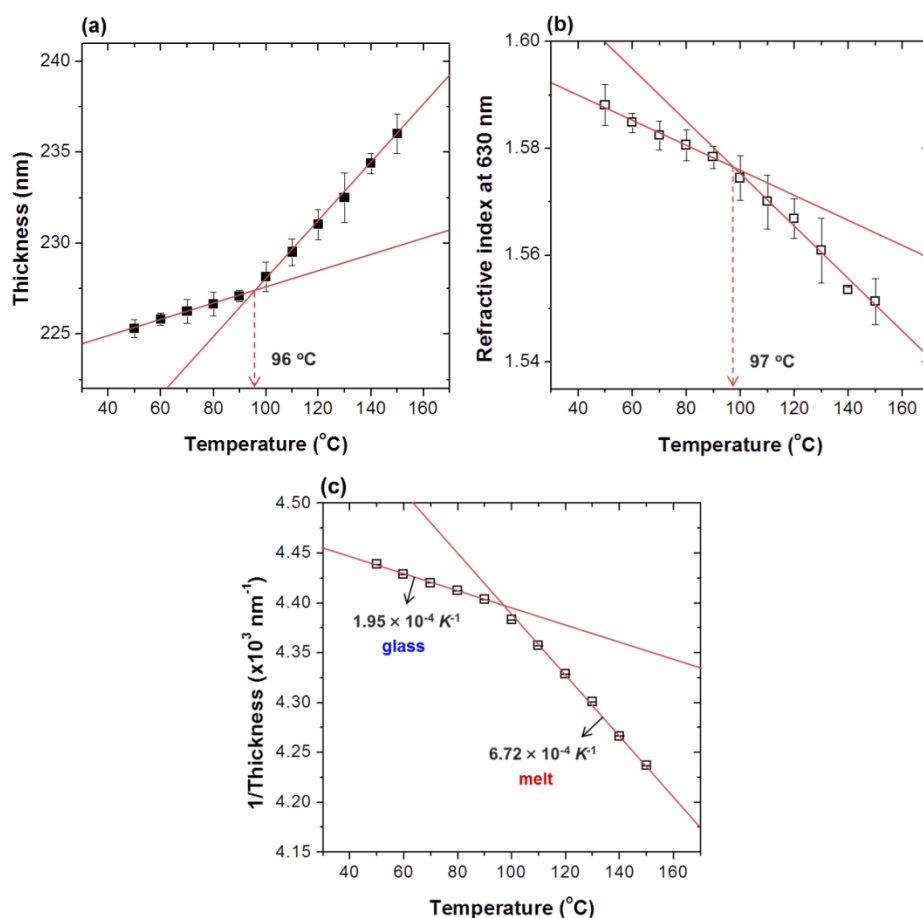

**Figure S13.** Thermal properties of a PS homopolymer. The sample was spin-coated on a silicon wafer with ~225 nm thickness. (a) The thickness and (b) refractive index of the polymer thin films as a function of temperature were determined from spectroscopic measurement (Filmetrics F20) with a heating stage (Linkam Scientific). The temperature of the samples on the heating stage was calibrated using a K-type digital thermometer. The refractive index of PS, obtained at 630 nm wavelength, was ~1.59 at 25 °C. From a change in the slope of the two linear fits to the thickness data, the glass transition temperature ( $T_g$ ) of PS was observed at 96 °C and the similar value (97 °C) was seen at the refractive data. (c) Thermal expansion coefficient is defined as  $\alpha \approx$

$-t_{avg}(d(l/t)/dT)$ , where  $t_{avg}$  indicates the average film thickness.<sup>8</sup> Using this equation, the  $\alpha$  values of PS at glass ( $1.95 \times 10^{-4} K^{-1}$ ) and melt ( $6.72 \times 10^{-4} K^{-1}$ ) states were determined.

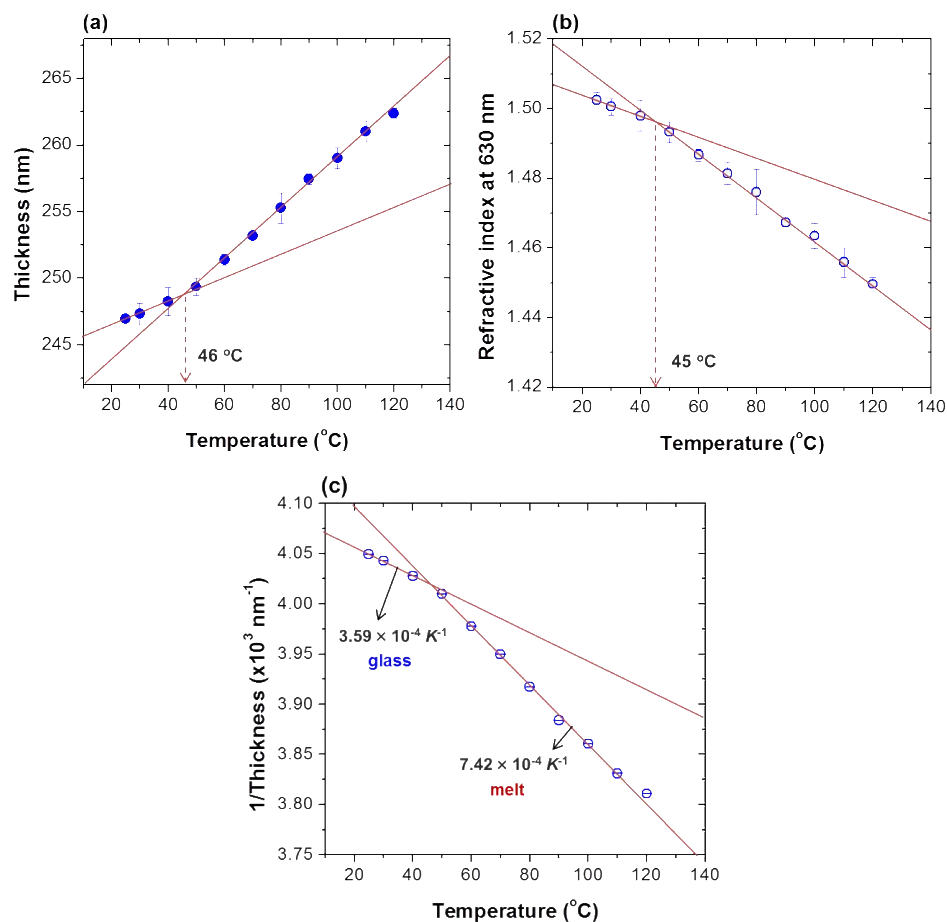

**Figure S14.** Thermal properties of a PSM homopolymer. The sample was spin-coated on a silicon wafer with ~246 nm thickness. (a) The thickness and (b) refractive index of the polymer thin films as a function of temperature were determined by the same instruments as mentioned in Figure S10. The refractive index of PSM, obtained at 630 nm wavelength, was ~1.51 at 25 °C. From a change in the slope of the two linear fits to the thickness data, the  $T_g$  of PSM was observed at 46 °C and the similar value (45 °C) was seen at the refractive data. (c) The  $\alpha$  values of PSM at glass and melt states, which is higher than that of PS, were  $3.59 \times 10^{-4} \text{ K}^{-1}$  and  $7.42 \times 10^{-4} \text{ K}^{-1}$ , respectively.



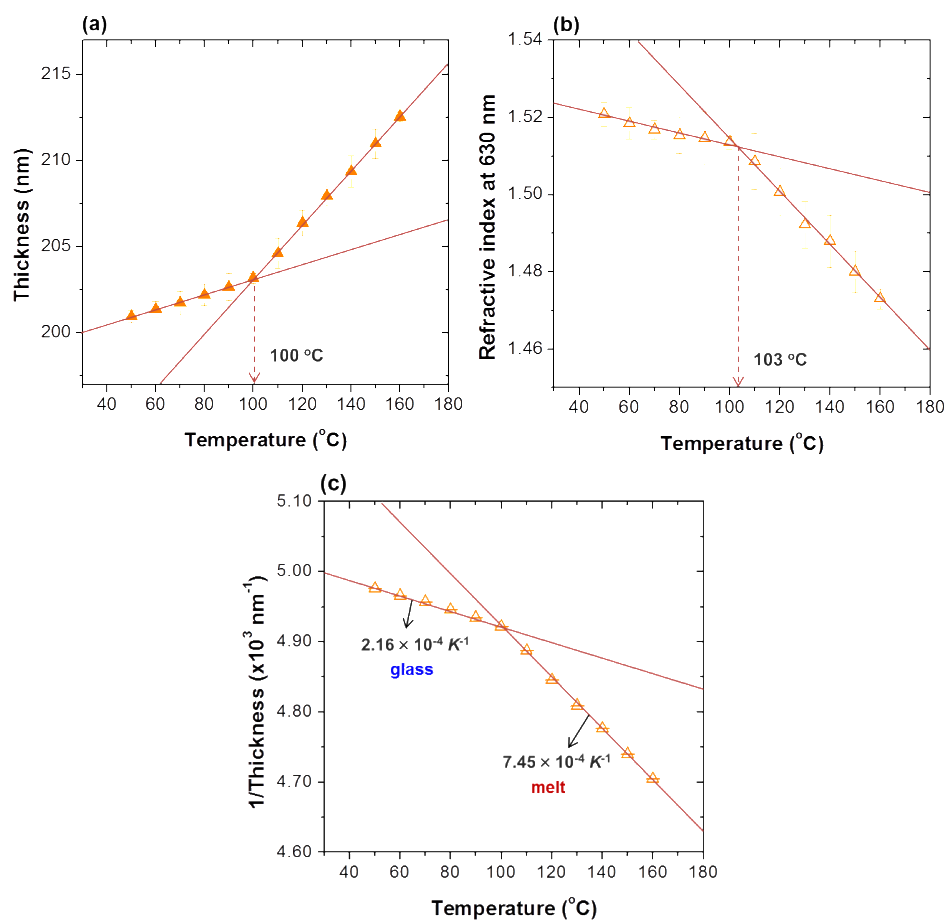

**Figure S15.** Thermal properties of a PGM homopolymer. The samples were prepared by exposing a spin-coated PSM thin film to trifluoroacetic acid (TFA) vapor for 10 min. (a) The thickness and (b) refractive index of the polymer thin films as a function of temperature were determined by the same instruments as mentioned in Figure S10. The refractive index of PGM, obtained at 630 nm wavelength, was  $\sim 1.52$  at 25 °C. From a change in the slope of the two linear fits to the thickness and refractive data, PGM showed a higher  $T_g$  ( $\sim 100$  °C) than that of PSM due to the strong hydrogen bonding. (c) The  $\alpha$  value of PGM at glass state ( $2.16 \times 10^{-4} \text{ K}^{-1}$ ) was lower, but it became similar to PSM at melt state ( $7.45 \times 10^{-4} \text{ K}^{-1}$ ).

## Reference

- [1] Leibler, L. Theory of Microphase Separation in Block Copolymers. *Macromolecules* **1980**, 13, 1602-1617.
- [2] Russell, T. P.; Hjelm Jr, R. P.; Seeger, P. A. Temperature Dependence of the Interaction Parameter of Polystyrene and Poly(methyl methacrylate). *Macromolecules* **1990**, 23, 890-893.
- [3] Ahn, H.; Ryu, D. Y.; Kim, Y.; Kwon, K. W.; Lee, J.; Cho, J. Phase Behavior of Polystyrene-*b*-poly(methyl methacrylate) Diblock Copolymer. *Macromolecules* **2009**, 42, 7897-7902.
- [4] Trent, J. S.; Scheinbeim, J. I.; Couchman, P. R. Ruthenium Tetraoxide Staining of Polymers for Electron Micorscopy. *Macromolecules* **1983**, 16, 589-598.
- [5] Kyeremateng, S. O.; Amado, E.; Kressler, J. Synthesis and Characterization of Random Copolymers of (2,2-Dimethyl-1,3-dioxolan-4-yl)methyl Methacrylate and 2,3-Dihydroxypropyl Methacrylate. *Eur. Polym. J.* **2007**, 43, 3380-3391.
- [6] Demirelli, K.; Coskun, M.; Kaya, E. A Detailed Study of Theraml Degradation of Poly(2-hydroxyethyl methacrylate). *Polym. Degrad. Stab.* **2001**, 72, 75-80.
- [7] Jeong, G.; Yu, D. M.; Mapas, J. K. D.; Sun, Z.; Rzayev, J.; Russell, T. P. Realizing 5.4 nm Full Pitch Lamellar Microdomains by a Solid-State Transformation. *Macromolecules* **2017**, 50, 7148-7154.
- [8] Beaucage, G.; Composto, R.; Stein, R. S. Ellipsometric Study of the Glass Transition and Thermal Expansion Coefficients of Thin Polymer Films. *J. Polym. Sci. B Polym. Phys.* **1993**, 319-326.
